# Supplementary material for: Hierarchical three-dimensional MnO2/carbon@TiO2 nanotube arrays for high-performance supercapacitors
Source: Royal Society of Chemistry journal article supplement (doi:10.1039/c6ra13628a), 2016-01-01
Supplement: c6ra13628a1.pdf [file c6ra13628a1.pdf]

## Supplementary Information

### **Hierarchical three-dimensional MnO<sub>2</sub>/Carbon@TiO<sub>2</sub> nanotube arrays for high-performance supercapacitors**

Zicheng Wang,<sup>a</sup> Yan Wang,<sup>\*ab</sup> Xia Shu,<sup>a</sup> Cuiping Yu,<sup>a</sup> Jianfang  
Zhang,<sup>a</sup> Jiewu Cui,<sup>a</sup> Yongqiang Qin,<sup>a</sup> Hongmei Zheng,<sup>a</sup> Yong  
Zhang,<sup>ac</sup> Yucheng Wu<sup>\*ac</sup>

<sup>a</sup>School of Materials Science and Engineering, Hefei University of Technology, Hefei  
230009 (China)

<sup>b</sup>Department of Materials Science and NanoEngineering, Rice University, Houston,  
Texas 77005 (United States)

<sup>c</sup>Key Laboratory of Advanced Functional Materials and Devices of Anhui Province,  
Hefei 230009(China)

\*Corresponding authors:

Dr. Yan Wang, Email: stone@hfut.edu.cn,

Prof. Yucheng Wu, Email: ycwu@hfut.edu.cn

Table S1. The relative elemental analysis of C, O and Ti in CTNAs

| Element      | Wt%   | At%   |
|--------------|-------|-------|
| <b>C</b>     | 8.58  | 16.99 |
| <b>O</b>     | 37.98 | 56.47 |
| <b>Ti</b>    | 53.44 | 26.54 |
| <b>Total</b> | 100.0 | 100.0 |

Table S2. The relative elemental analysis of C, O, Ti and Mn in

CMTNAs

| Element      | Wt%   | At%   |
|--------------|-------|-------|
| <b>C</b>     | 3.40  | 7.79  |
| <b>O</b>     | 32.78 | 56.41 |
| <b>Ti</b>    | 51.81 | 29.78 |
| <b>Mn</b>    | 12.01 | 6.02  |
| <b>Total</b> | 100.0 | 100.0 |

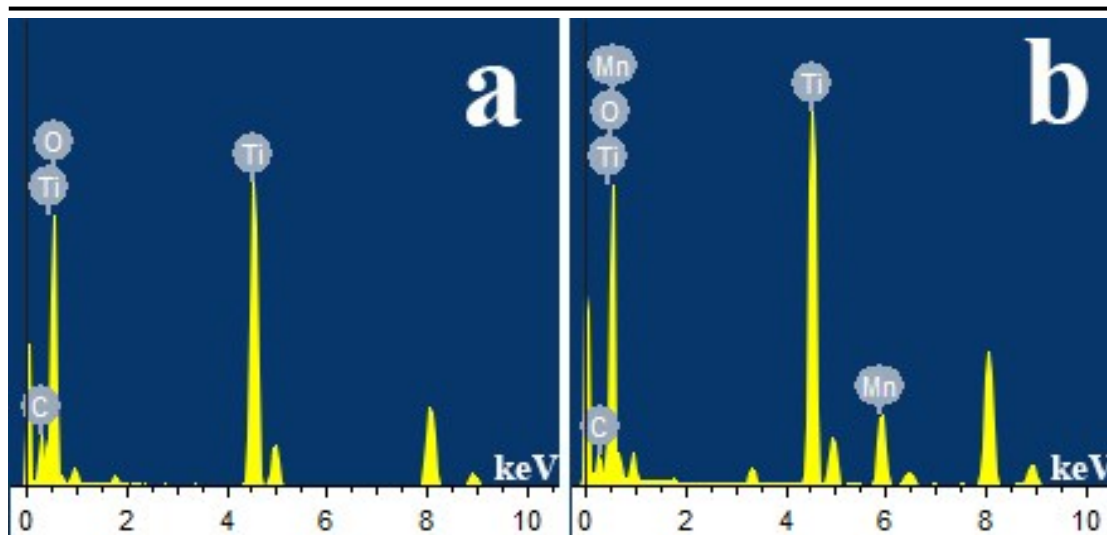

Figure S1. EDX analysis of (a) CTNAs and (b) CMTNAs

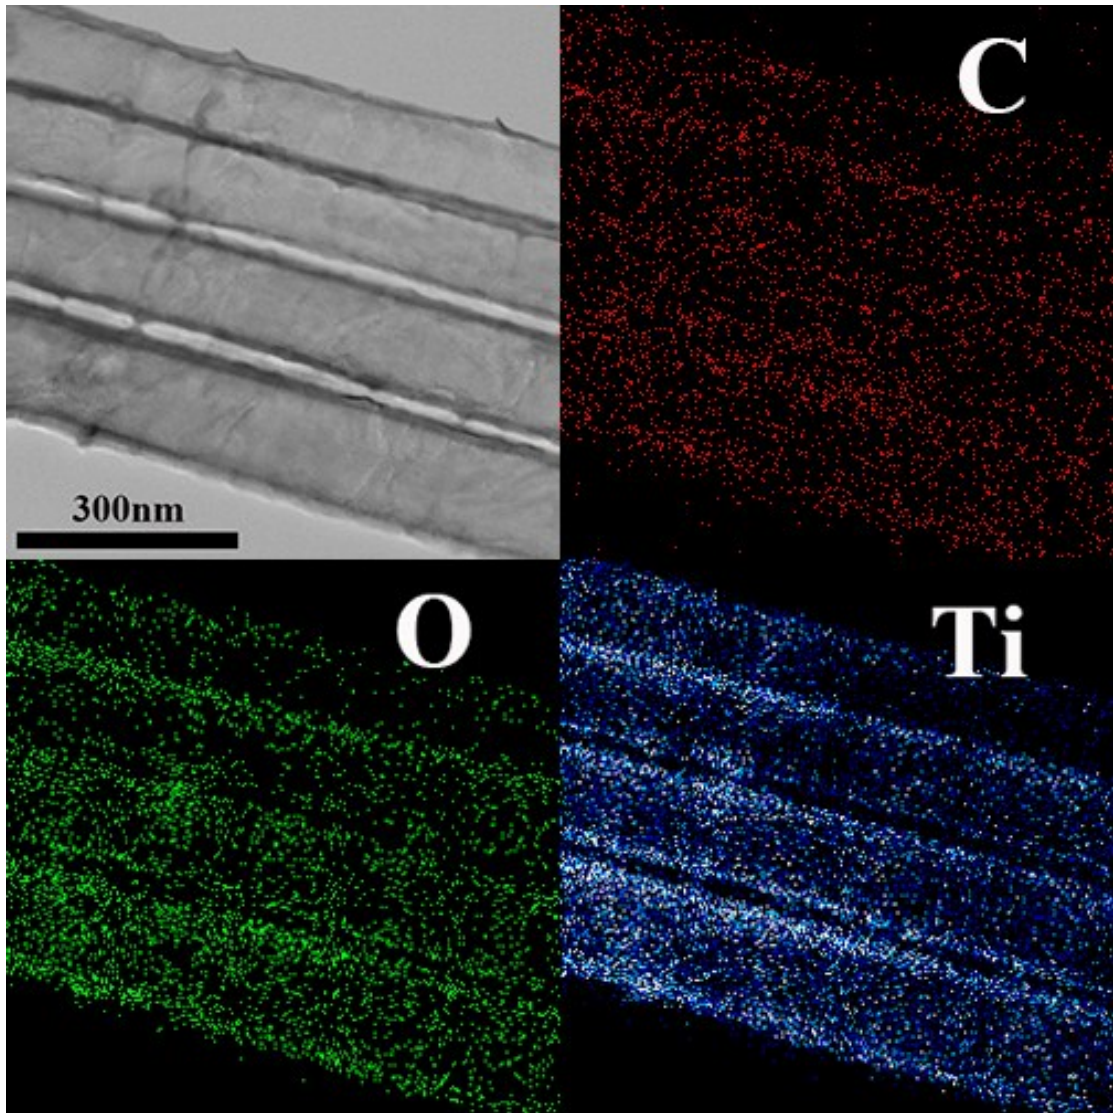

Figure S2. EDS mapping of nanotubes of CTNAs

Table S3. The loading mass of MnO<sub>2</sub> on different samples

| Sample              | Width (cm) | Height (cm) | Area (cm <sup>2</sup> ) | Loading mass of MnO <sub>2</sub> (mg) |
|---------------------|------------|-------------|-------------------------|---------------------------------------|
| ATNAs               | 2          | 3.2         | 6.4                     | 0                                     |
| CTNAs               | 2          | 3.2         | 6.4                     | 0                                     |
| CMTNAs (Sample-I)   | 2          | 3.2         | 6.4                     | 1.41                                  |
| CMTNAs (Sample-II)  | 2          | 3.2         | 6.4                     | 2.75                                  |
| CMTNAs (Sample-III) | 2          | 3.2         | 6.4                     | 3.6                                   |
| CMTNAs (Sample-IV)  | 2          | 3.2         | 6.4                     | 3.9                                   |
| CMTNAs (Sample-V)   | 2          | 3.2         | 6.4                     | 4.0                                   |

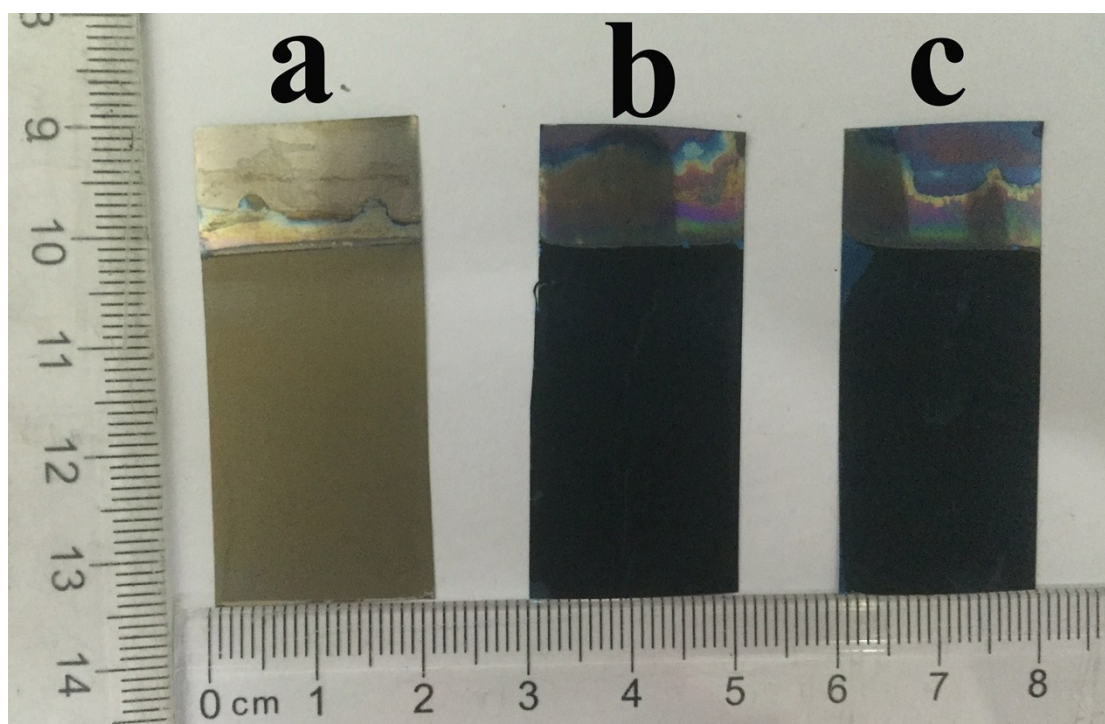

Figure S3. The digital photographs of (a) ATNAs, (b) CTNAs and (c) CMTNAs

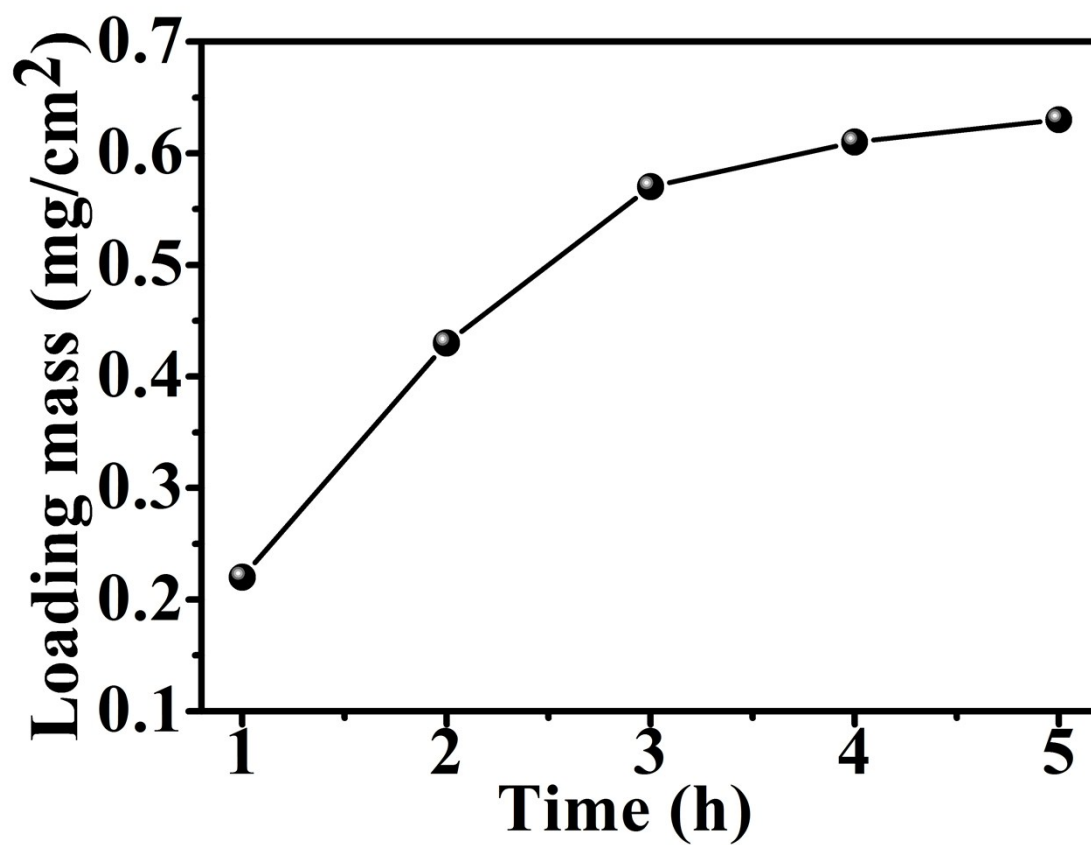

Figure S4. The loading mass of MnO<sub>2</sub> as a function of the time of hydrothermal treatment



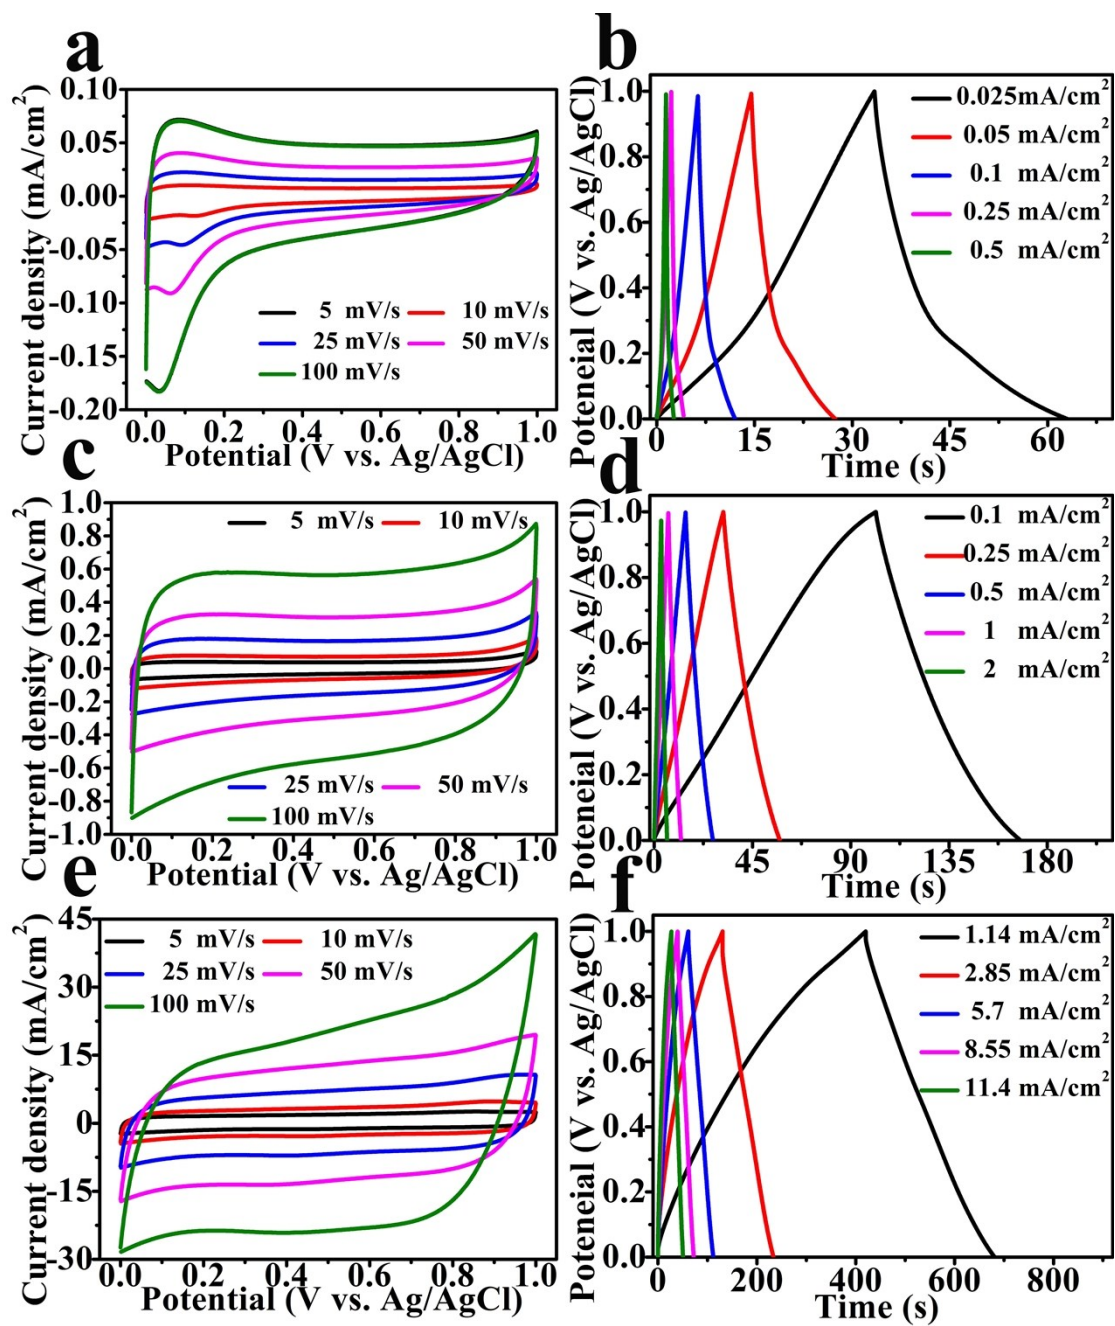

Figure S5. CV curves of (a) ACTNAs, (c) CTNAs and (e) Sample-III at different scan rates; GCD curves of (b) ATNAs, (d) CTNAs and (f) Sample-III measured at different current densities

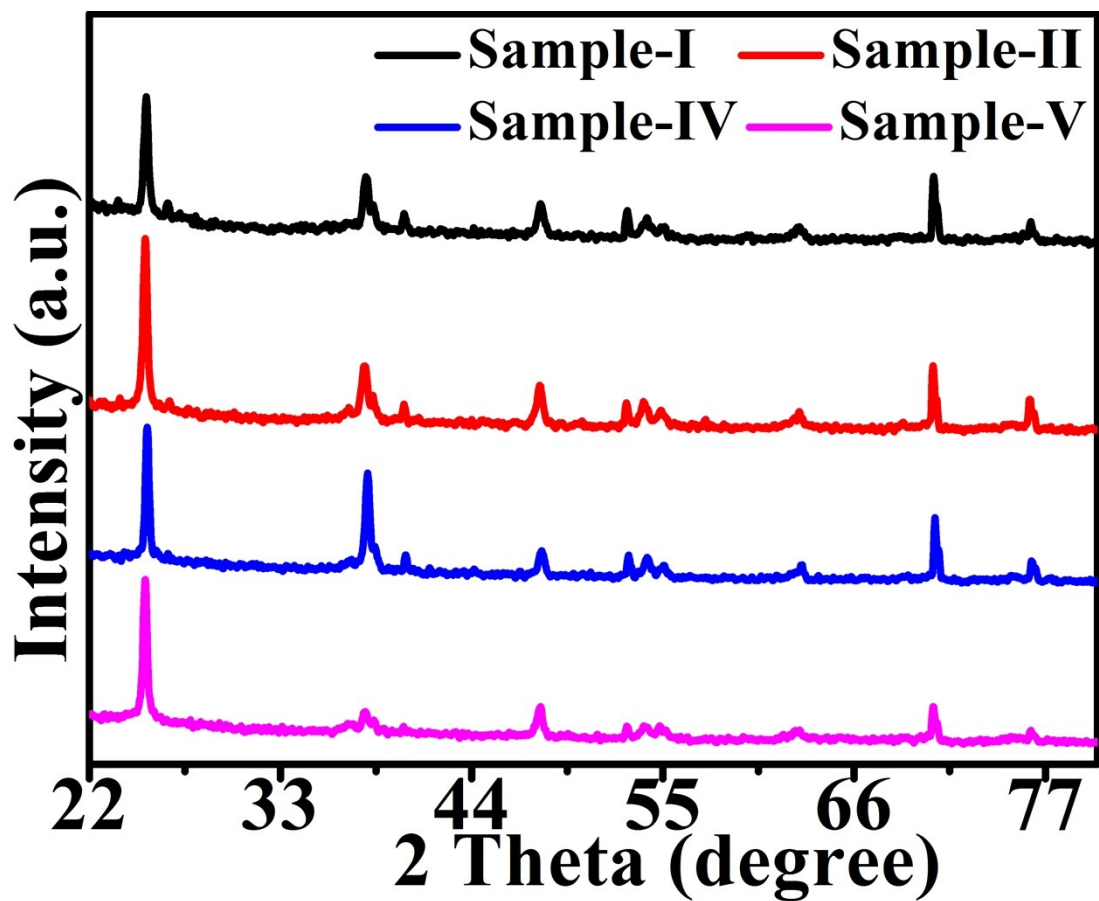

Figure S6. XRD patterns of Sample-I, II, IV and V

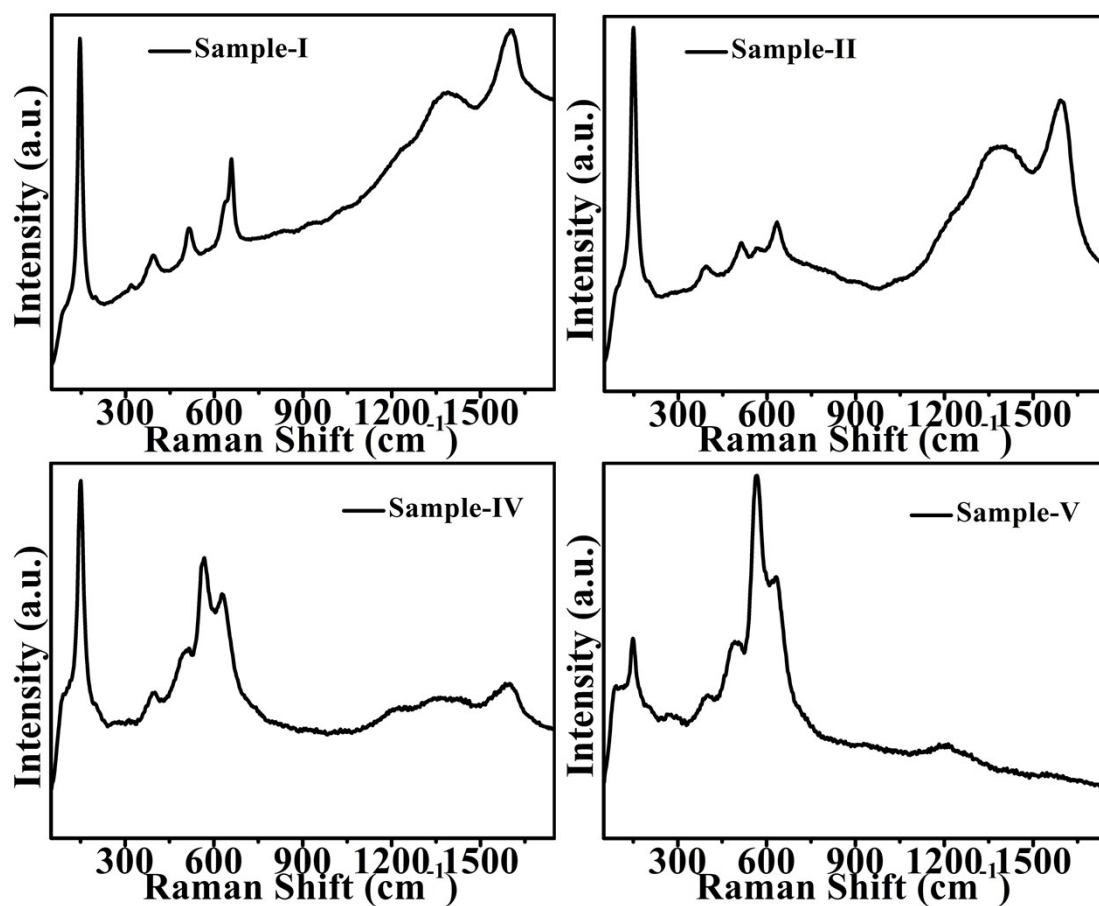

Figure S7. Raman spectra of Sample-I, II, IV and V



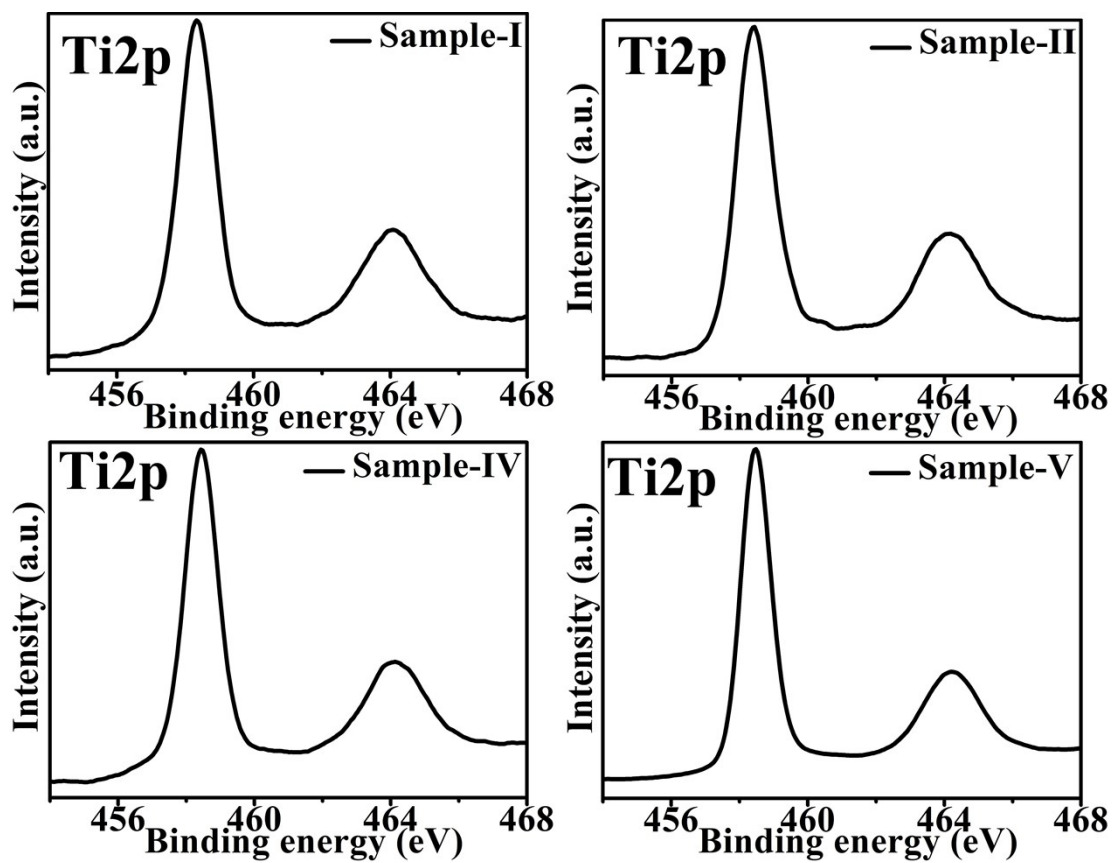

Figure S8. XPS peaks of Ti2p of Sample-I, II, IV and V

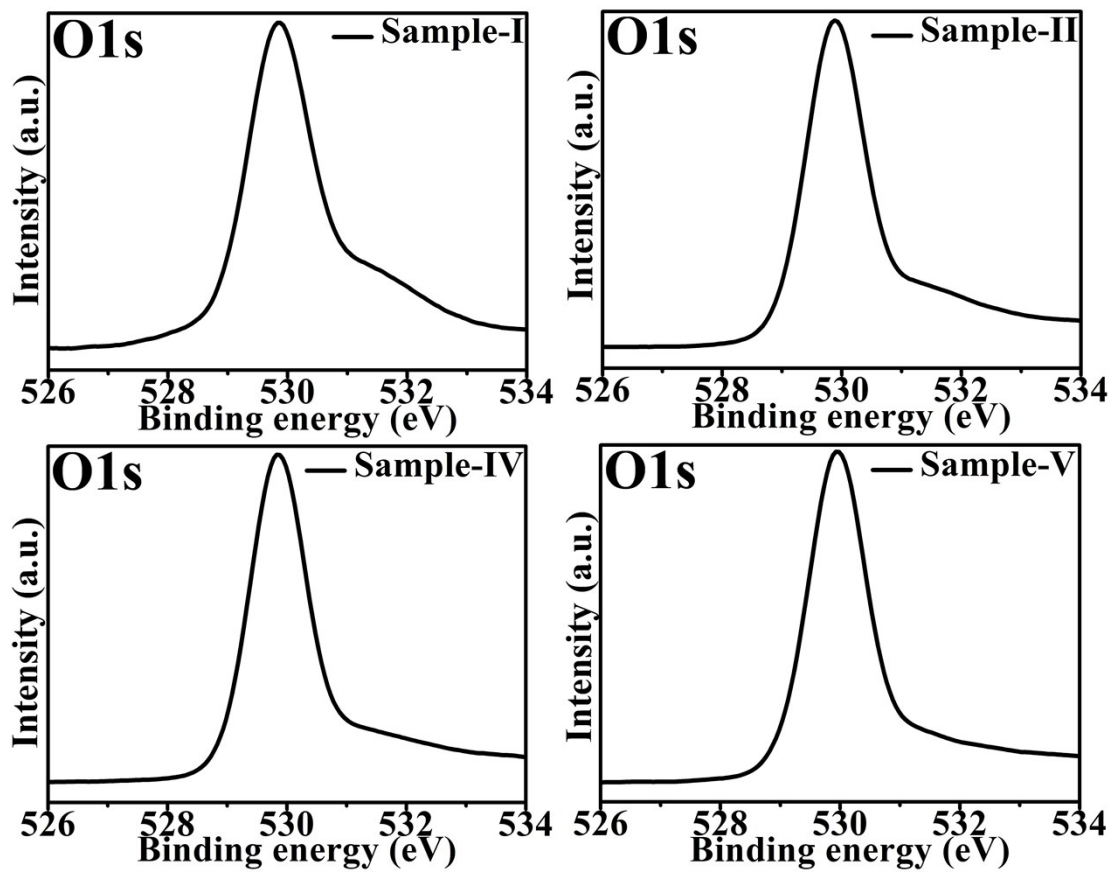

Figure S9. XPS peaks of O1s of Sample-I, II, IV and V

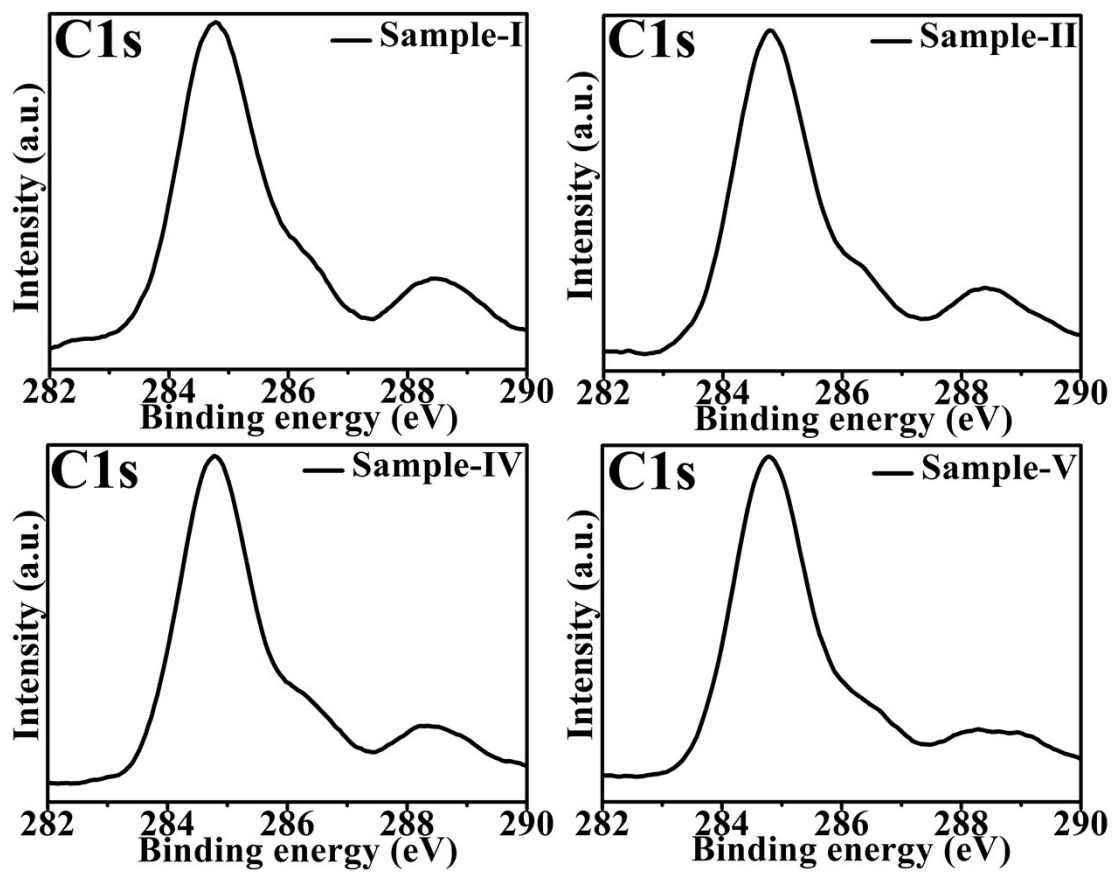

Figure S10. XPS peaks of C1s of Sample-I, II, IV and V

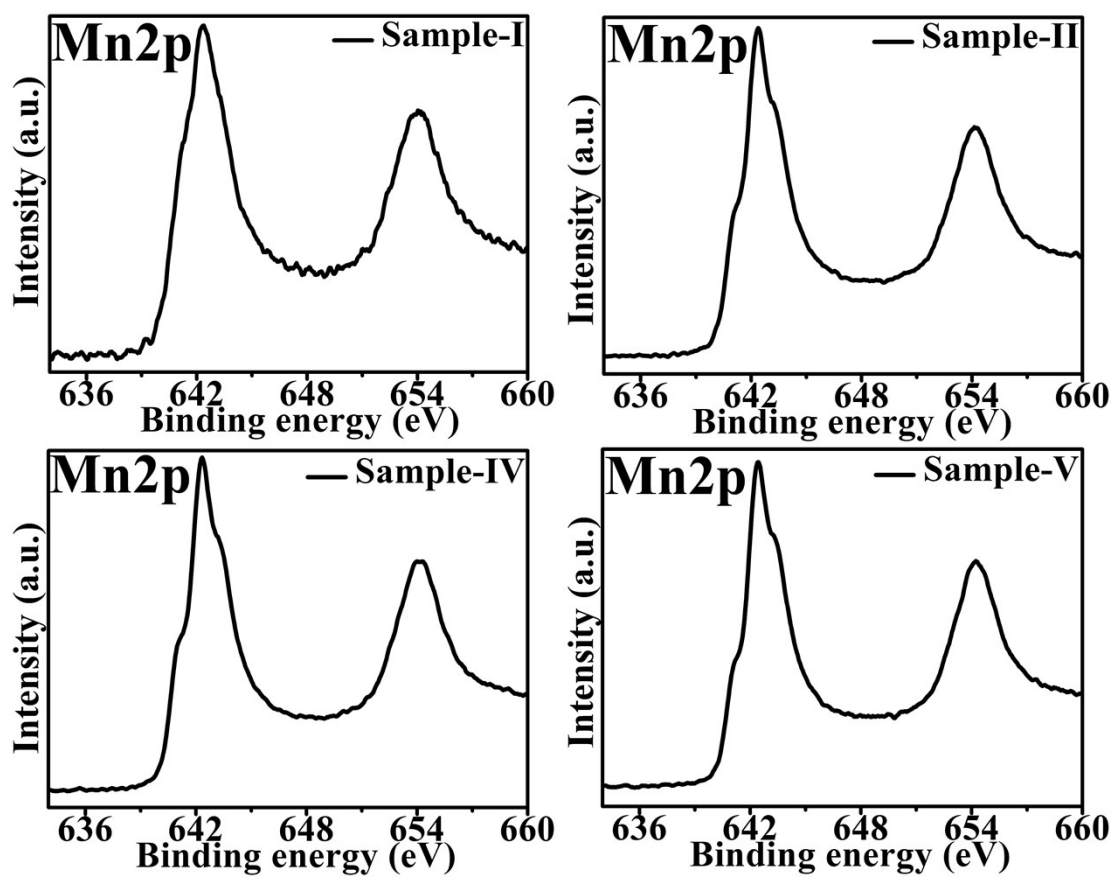

Figure S11. XPS peaks of Mn2p of Sample-I, II, IV and V

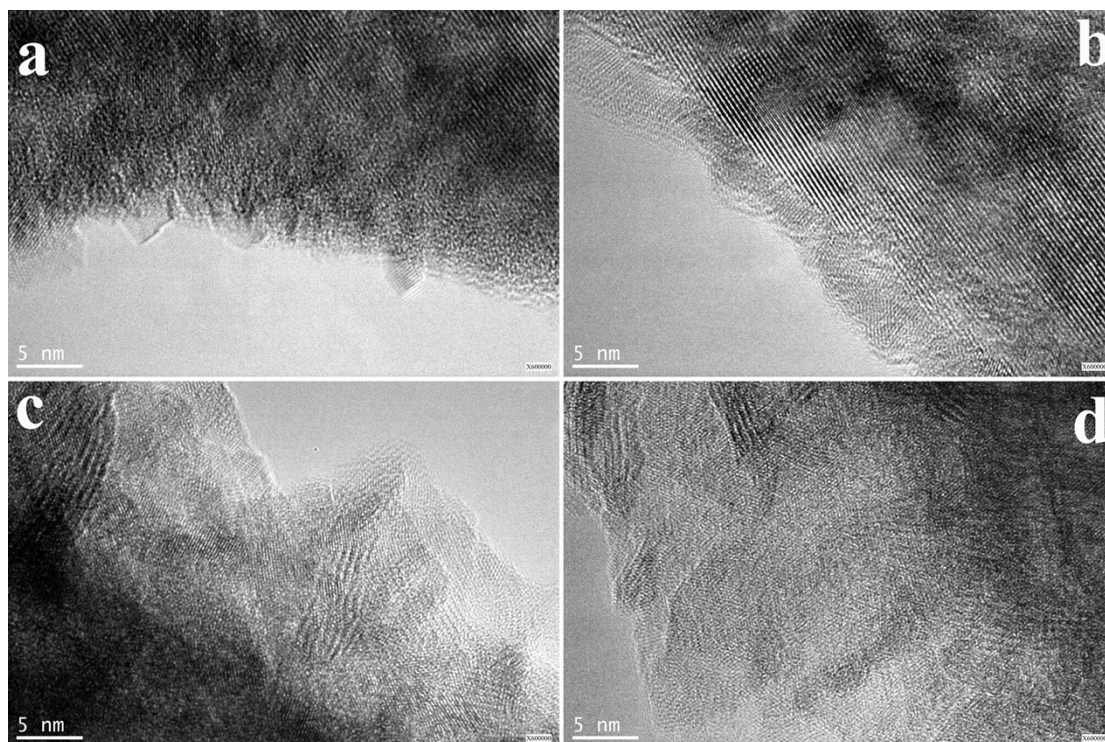

Figure S12. HRTEM images of (a) Sample-I, (b) Sample-II, (c) Sample-

IV and (d) Sample-V

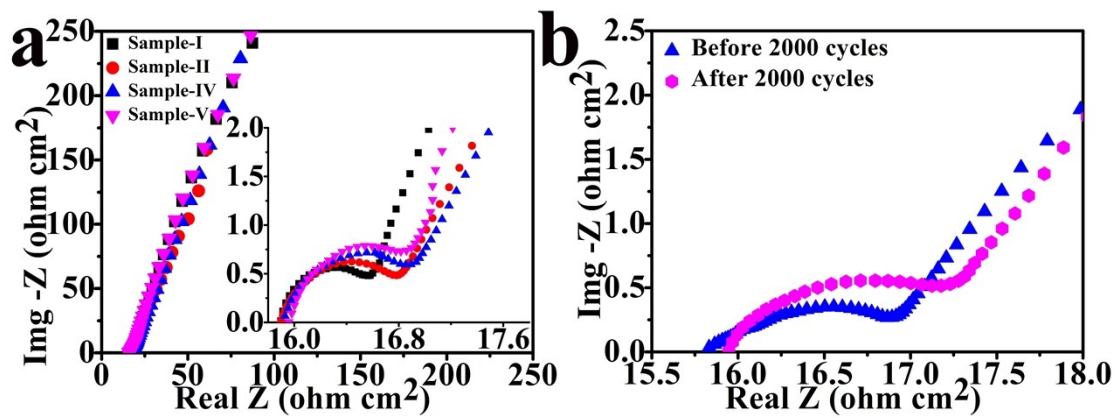

Figure S13. (a) Nyquist plots of Sample-I, II, IV and V; (b)

Electrochemical impedance spectroscopy curves of CMTNAs measured

before and after 2000 charge-discharge cycles
